# Supplementary material
Source: publisher figshare collection journal article supplement (https://acs.figshare.com/ndownloader/files/8857117)
Supplement: Supplementary file 1 [file 8857117]

 
Effect of Ancillary Ligands (A) on Oxidative Addition of CH4 to Rhenium(III) Complexes: A = B, Al, CH, SiH, N, P Using MP2, CCSD(T), and MCSCF Methods.

Riffat Parveen and Thomas R. Cundari*

Department of Chemistry and Center of Advanced Scientific Computing and Modeling, University of North Texas, 115 Union Circle, #305070, Denton, Texas 76203-5017, United States 

All calculations were performed using the Gaussian 09 software package. MP2 calculations were carried out using CEP-31G pseudopotential/valence basis set for Re/Ta and the 6-31+G(d) all-electron basis set for other elements. Geometry optimization were performed in the gas phase; however, single point calculations at all stationary points were done in acetone using the SMD continuum solvent model with the larger 6-311++G(d,p) basis set. Below are the Cartesian coordinates for all optimized structures of reactants, transition states and products. 

5
symmetry c3v
methane
H        0.000000000      0.000000000      1.090976000
C        0.000000000      0.000000000     -0.000008000
H        0.000000000      1.028801000     -0.363642000
H        0.890967000     -0.514400000     -0.363642000
H       -0.890967000     -0.514400000     -0.363642000

23
symmetry c1
Re(OC2H4)3B-t
O       -0.663975000     -1.727004000      0.607964000
O       -0.582578000      1.425375000      1.192293000
O       -0.564107000      0.353850000     -1.830039000
C        0.795932000      0.472369000     -2.408333000
H        1.019620000      1.544257000     -2.420651000
H        0.691802000      0.118651000     -3.438855000
C        1.779646000     -0.313691000     -1.553842000
H        1.684907000     -1.381193000     -1.804893000
H        2.809848000     -0.023237000     -1.821925000
C        0.768668000      1.827853000      1.650880000
H        0.930526000      1.297643000      2.595241000
H        0.685408000      2.900037000      1.854413000
C        1.795383000      1.450872000      0.592831000
H        1.761979000      2.203223000     -0.209926000
H        2.807401000      1.508564000      1.028757000
C        0.661828000     -2.364193000      0.793505000
H        0.853517000     -2.921993000     -0.129135000
H        0.517166000     -3.073280000      1.614601000
C        1.708762000     -1.289395000      1.047426000
H        1.632057000     -0.968374000      2.097510000
H        2.715673000     -1.725174000      0.930142000
B        1.473690000     -0.042549000      0.024147000
Re      -0.747392000      0.021506000     -0.012167000

23
symmetry c1
Re(OC2H4)3Al-t
O        0.702443000     -1.838998000     -0.156850000
O        0.695033000      1.058176000     -1.515463000
O        0.695484000      0.786110000      1.672528000
C       -0.553180000      1.628608000     -2.077463000
H       -0.677625000      2.596189000     -1.579063000
H       -0.295840000      1.806630000     -3.126960000
C       -1.773723000      0.734947000     -1.878644000
H       -1.731565000     -0.096516000     -2.598169000
H       -2.668410000      1.322563000     -2.134869000
C       -0.551715000      0.983149000      2.450204000
H       -0.671523000      0.067446000      3.039478000
H       -0.295942000      1.804171000      3.128336000
C       -1.775114000      1.253050000      1.579349000
H       -1.737317000      2.291851000      1.218380000
H       -2.668179000      1.178396000      2.218299000
C       -0.542347000     -2.615641000     -0.372674000
H       -0.664127000     -2.668352000     -1.460098000
H       -0.282094000     -3.612545000     -0.001440000
C       -1.766800000     -2.001240000      0.298986000
H       -2.658622000     -2.520314000     -0.083941000
H       -1.726450000     -2.208465000      1.378910000
Al      -1.727724000     -0.004476000     -0.000024000
Re       0.847623000      0.002101000      0.000016000

24
symmetry c1
Re(OC2H4)3CH-q
O        0.287167000     -1.492978000      1.132040000
O       -1.672623000      1.319267000      0.156105000
O        0.323835000     -0.947340000     -1.536591000
C        1.730971000     -1.067860000     -1.298481000
H        2.176738000     -1.408803000     -2.241276000
H        1.897247000     -1.847917000     -0.549655000
C        2.409171000      0.260143000     -0.899126000
H        3.408315000      0.002674000     -0.515436000
H        2.583134000      0.844781000     -1.812755000
C       -0.722158000      2.418585000      0.109772000
H       -0.557487000      2.768459000      1.136085000
H       -1.218701000      3.222959000     -0.443801000
C        0.595317000      2.081445000     -0.607667000
H        0.333397000      1.624306000     -1.570744000
H        1.044632000      3.050604000     -0.866757000
C        1.385998000     -0.832783000      1.768423000
H        2.321208000     -1.305253000      1.438627000
H        1.295394000     -1.007871000      2.848643000
C        1.459721000      0.681265000      1.541354000
H        0.560396000      1.142424000      1.973324000
H        2.284237000      1.024218000      2.182408000
C        1.730808000      1.237429000      0.101156000
H        2.514629000      1.985128000      0.272420000
Re      -0.822522000     -0.397289000     -0.055415000

24
symmetry c1
Re(OC2H4)3SiH-t
O       -0.905867000     -0.450176000      1.700257000
O       -0.817919000     -1.268187000     -1.315462000
O       -0.556607000      1.894494000     -0.449588000
C        0.307096000     -0.989156000      2.313155000
H        0.131976000     -0.910088000      3.391210000
H        0.348364000     -2.052686000      2.050043000
C        1.580863000     -0.264255000      1.895489000
H        2.424170000     -0.746062000      2.414140000
H        1.539332000      0.765365000      2.283623000
C        0.298070000     -2.210035000     -1.313226000
H        0.131062000     -2.892543000     -0.471396000
H        0.184202000     -2.781748000     -2.240217000
C        1.667565000     -1.552014000     -1.222891000
H        1.913828000     -1.106025000     -2.198775000
H        2.412398000     -2.346438000     -1.063684000
C        0.749580000      2.520230000     -0.307211000
H        0.694754000      3.438455000     -0.901563000
H        0.853563000      2.800215000      0.748124000
C        1.881462000      1.614118000     -0.761094000
H        2.831479000      2.143614000     -0.591336000
H        1.800978000      1.472106000     -1.848922000
Si       2.028883000     -0.134571000      0.026992000
H        3.535265000     -0.269052000      0.089560000
Re      -0.904939000      0.109953000     -0.068609000

23
symmetry c1
Re(OC2H4)3N-s
O        0.547441000     -0.518860000      1.803549000
O       -1.978877000     -0.553485000     -0.354213000
O        1.455140000     -0.747485000     -1.214345000
C        2.134861000      0.518675000     -1.183600000
H        2.728360000      0.631693000     -2.100482000
H        2.828155000      0.521360000     -0.332350000
C        1.131166000      1.664879000     -1.085890000
H        1.594133000      2.599898000     -0.741676000
H        0.702516000      1.835972000     -2.076138000
C       -2.427239000      0.807538000     -0.262091000
H       -2.704937000      1.021457000      0.779676000
H       -3.322914000      0.939175000     -0.882952000
C       -1.325607000      1.730340000     -0.758395000
H       -1.243250000      1.604179000     -1.840804000
H       -1.509380000      2.791222000     -0.529760000
C        0.979282000      0.834838000      2.050041000
H        2.044085000      0.920401000      1.796089000
H        0.866596000      1.051684000      3.119703000
C        0.135649000      1.802694000      1.232692000
H       -0.871154000      1.832027000      1.659852000
H        0.546820000      2.822844000      1.221972000
N       -0.009974000      1.282821000     -0.170886000
Re      -0.073967000     -0.761957000     -0.009512000

23
symmetry c1
Re(OC2H4)P-q
O       -0.083723000     -1.578831000      1.144025000
O       -1.537964000      1.551754000      0.114833000
O       -0.035777000     -1.153279000     -1.535970000
C        1.309359000     -1.588881000     -1.344035000
H        1.605106000     -2.108695000     -2.264831000
H        1.347702000     -2.307338000     -0.518779000
C        2.287819000     -0.423108000     -1.121473000
H        3.275896000     -0.850336000     -0.897289000
H        2.411253000      0.114222000     -2.072864000
C       -0.504213000      2.558492000      0.051629000
H       -0.267080000      2.872899000      1.076306000
H       -0.939481000      3.419064000     -0.468866000
C        0.750867000      2.109149000     -0.709157000
H        0.439824000      1.685159000     -1.673112000
H        1.311743000      3.023474000     -0.943861000
C        1.062689000     -1.163010000      1.880562000
H        1.923135000     -1.773164000      1.569012000
H        0.877687000     -1.374496000      2.942528000
C        1.408527000      0.324084000      1.738848000
H        0.562028000      0.938059000      2.080258000
H        2.218766000      0.530563000      2.450725000
P        2.071735000      0.992044000      0.095786000
Re      -0.939642000     -0.273435000     -0.046365000

transition states
28
symmetry c1
Re{(OC2H4)3B(CH3)(H)} (1)
O       -0.808141000     -0.297490000     -1.554996000
O        0.555413000      1.802942000      0.004443000
O        0.709441000     -1.700133000      0.547261000
C       -0.277220000      2.221106000      1.103316000
H        0.200002000      1.891436000      2.037469000
H       -0.262441000      3.316686000      1.086853000
C       -1.705693000      1.681928000      1.003112000
H       -2.230579000      2.221208000      0.204146000
H       -2.224983000      1.945670000      1.943688000
C       -0.524781000     -2.127027000      1.181684000
H       -1.156874000     -2.601925000      0.420426000
H       -0.226668000     -2.881715000      1.916687000
C       -1.237437000     -0.943961000      1.846710000
H       -0.564661000     -0.504218000      2.595967000
H       -2.102978000     -1.353335000      2.403305000
C       -2.214086000      0.008514000     -1.618754000
H       -2.311566000      1.087353000     -1.793756000
H       -2.617882000     -0.522048000     -2.488434000
C       -2.860140000     -0.399499000     -0.299026000
H       -3.843190000      0.089774000     -0.202298000
H       -3.029359000     -1.483000000     -0.283845000
B       -1.871785000      0.109435000      0.837342000
H        2.331869000      0.013611000     -0.770488000
C        2.640030000      0.163203000      0.754078000
H        3.298311000      1.013932000      0.555284000
H        2.115284000      0.354851000      1.703692000
H        3.220579000     -0.757270000      0.859584000
Re       0.695818000     -0.059284000     -0.402338000

28
symmetry c1
Re{(OC2H4)3Al(CH3)(H)} (3)
O       -1.031814000     -0.083010000     -1.061694000
O        0.850192000      1.723236000     -0.137547000
O        0.660713000     -1.680011000      0.666937000
C       -0.019381000      2.626091000      0.626174000
H        0.305908000      2.524375000      1.668727000
H        0.288761000      3.614898000      0.268683000
C       -1.524919000      2.394034000      0.502400000
H       -1.881336000      2.812204000     -0.449463000
H       -1.994915000      2.988612000      1.300384000
C       -0.545344000     -1.983593000      1.449643000
H       -1.213341000     -2.573185000      0.810338000
H       -0.175875000     -2.636123000      2.248459000
C       -1.223789000     -0.715684000      1.971227000
H       -0.517454000     -0.197551000      2.638037000
H       -2.052752000     -1.045827000      2.621513000
C       -2.124125000     -1.007541000     -1.472963000
H       -2.227678000     -0.864512000     -2.552498000
H       -1.804882000     -2.036563000     -1.276782000
C       -3.320174000     -0.559496000     -0.627959000
H       -4.031126000      0.029180000     -1.216893000
H       -3.854581000     -1.399705000     -0.171997000
Al      -2.006898000      0.452934000      0.512815000
H        2.499750000     -0.275442000     -0.823979000
C        2.953094000     -0.129163000      0.521103000
H        3.821380000      0.424990000      0.148925000
H        2.587972000      0.408920000      1.408189000
H        3.245703000     -1.144060000      0.799653000
Re       0.854523000     -0.132639000     -0.368630000

29
symmetry c1
Re{(OC2H4)3CH(CH3)(H)} (5)
O        0.793349000      1.538078000     -0.819636000
O        0.203955000     -0.912549000      1.461737000
O       -0.565698000     -1.280546000     -1.109498000
C        2.747760000      0.388283000      0.847270000
H        2.726573000      1.468086000      0.669166000
H        2.473194000      0.130883000      1.875606000
H        3.781794000      0.051667000      0.696196000
C       -0.437443000      0.202837000      2.104855000
H       -0.438203000     -0.023019000      3.179852000
H        0.182161000      1.105591000      1.981305000
C       -1.891027000      0.496985000      1.699077000
H       -2.525543000     -0.272569000      2.161012000
H       -2.131869000      1.431523000      2.230154000
C       -1.749241000     -1.791642000     -0.479774000
H       -1.475845000     -2.153671000      0.519173000
H       -2.100111000     -2.636359000     -1.084553000
C       -2.822923000     -0.721236000     -0.389374000
H       -3.651890000     -1.145363000      0.197940000
H       -3.225031000     -0.522107000     -1.391696000
C       -0.408223000      2.301311000     -0.554227000
H       -0.339536000      2.679835000      0.475354000
H       -0.344522000      3.159878000     -1.231660000
C       -1.727320000      1.569807000     -0.813095000
H       -1.599729000      1.021387000     -1.754114000
H       -2.446492000      2.370659000     -1.036790000
C       -2.417086000      0.630691000      0.239587000
H        2.471600000     -0.598204000     -0.213664000
H       -3.391299000      1.110076000      0.413293000
Re       0.810865000     -0.272005000     -0.264977000


29
symmetry c1
Re{(OC2H4)3SiH(CH3)(H)} (7)
O        0.995533000      1.681811000     -0.511376000
O        0.316525000     -1.378080000      1.104030000
O       -0.423599000     -0.953856000     -1.479068000
C        2.757737000      0.111239000      0.993356000
H        2.468712000      1.083219000      1.411898000
H        2.708756000     -0.682204000      1.743907000
H        3.799006000      0.217571000      0.663704000
C       -0.234074000     -0.677495000      2.231380000
H       -0.164251000     -1.370185000      3.079688000
H        0.395201000      0.192426000      2.474501000
C       -1.687321000     -0.233084000      2.039040000
H       -2.342541000     -1.109633000      2.161593000
H       -1.942194000      0.440122000      2.871922000
C       -1.606114000     -1.714975000     -1.169141000
H       -1.374419000     -2.358279000     -0.310844000
H       -1.809877000     -2.340250000     -2.045652000
C       -2.759714000     -0.775727000     -0.853063000
H       -3.613276000     -1.364562000     -0.484471000
H       -3.097338000     -0.280778000     -1.774295000
C       -0.072302000      2.544880000     -0.064390000
H        0.057438000      2.685924000      1.018353000
H        0.120327000      3.505841000     -0.554480000
C       -1.481386000      2.058531000     -0.403031000
H       -1.521660000      1.881927000     -1.487047000
H       -2.147109000      2.914577000     -0.213424000
Si      -2.354939000      0.562270000      0.433396000
H        2.542179000     -0.508286000     -0.331300000
H       -3.682692000      1.100982000      0.864370000
Re       0.879523000     -0.194125000     -0.329461000

28
symmetry c1
Re{(OC2H4)3N(CH3)(H)} (9)
O        0.977991000      1.723250000     -0.056376000
O        0.103666000     -1.909976000      0.094203000
O       -0.691675000      0.050074000     -1.833131000
C        2.098101000     -0.412457000      1.438196000
H        1.795212000      0.439083000      2.053065000
H        3.197951000     -0.424072000      1.464927000
H        1.758762000     -1.362624000      1.856531000
H        2.270315000     -0.436692000      0.060134000
C       -0.128294000      2.482871000      0.441517000
H        0.257626000      3.401505000      0.899086000
H       -0.777642000      2.757576000     -0.401994000
C       -2.036640000     -0.213450000     -1.444444000
H       -2.177214000     -1.300712000     -1.402915000
H       -2.712056000      0.185675000     -2.212391000
C       -1.002753000     -2.087876000      0.979406000
H       -1.887790000     -2.388341000      0.404208000
H       -0.772966000     -2.903592000      1.677824000
C       -1.274251000     -0.801789000      1.766807000
H       -0.488515000     -0.660947000      2.514192000
H       -2.248171000     -0.850927000      2.282829000
C       -0.885561000      1.644964000      1.471228000
H       -1.792334000      2.158767000      1.829063000
H       -0.231780000      1.453000000      2.326762000
C       -2.355301000      0.442933000     -0.095359000
H       -2.552602000      1.505417000     -0.265226000
H       -3.251137000      0.004004000      0.369838000
N       -1.200420000      0.344545000      0.841395000
Re       0.645382000     -0.123025000     -0.431032000

28
symmetry c1
Re{(OC2H4)3P(CH3)(H)} (11)
O       -0.769890000      1.780298000     -0.214692000
O       -0.685882000     -1.745304000     -0.438439000
O        0.355163000     -0.046806000      1.681569000
C       -2.655998000      0.065793000     -1.269514000
H       -3.468350000     -0.662612000     -1.362747000
H       -1.942133000     -0.146152000     -2.078485000
H       -3.047271000      1.079984000     -1.382670000
H       -2.681192000     -0.089758000      0.169474000
C        0.556375000      2.344866000     -0.218967000
H        0.420425000      3.394920000     -0.503194000
H        0.963477000      2.302290000      0.798625000
C        1.689083000     -0.439276000      1.945275000
H        1.743750000     -1.533898000      1.983469000
H        1.934640000     -0.072875000      2.951200000
C        0.632928000     -2.292348000     -0.591222000
H        1.061017000     -2.505794000      0.392152000
H        0.487943000     -3.248431000     -1.108730000
C        1.559909000     -1.420493000     -1.440690000
H        1.021478000     -1.134743000     -2.355898000
H        2.371815000     -2.082044000     -1.776117000
C        1.472515000      1.662093000     -1.234081000
H        2.246289000      2.395370000     -1.503089000
H        0.901107000      1.488060000     -2.156638000
C        2.726971000      0.108397000      0.958766000
H        2.942886000      1.158304000      1.200782000
H        3.665783000     -0.431258000      1.146356000
P        2.496811000      0.118558000     -0.891682000
Re      -0.975462000     -0.023592000      0.291145000

PRODUCTS
28
symmetry c1
Re{(OC2H4)3B(CH3)(H)} (2)
O        0.826430000     -0.626462000      0.706813000
O       -0.492107000      1.798897000      0.061487000
O       -0.521207000     -0.889015000     -1.577684000
C        0.834901000      2.447596000     -0.068113000
H        0.905625000      2.679276000     -1.135828000
H        0.699201000      3.381707000      0.485220000
C        2.018941000      1.627969000      0.411796000
H        2.066258000      1.674746000      1.510040000
H        2.918071000      2.152502000      0.047212000
C        0.852101000     -1.353980000     -1.889725000
H        1.037754000     -2.235714000     -1.267748000
H        0.769126000     -1.653665000     -2.938605000
C        1.875013000     -0.249778000     -1.643985000
H        1.580672000      0.617515000     -2.255649000
H        2.833873000     -0.594559000     -2.063343000
C        1.747667000     -1.142829000      1.721792000
H        1.671156000     -0.531872000      2.628844000
H        1.484078000     -2.180427000      1.954909000
C        3.003364000     -0.882387000      0.886184000
H        3.832747000     -0.423786000      1.436348000
H        3.363718000     -1.797492000      0.400227000
B        2.059788000      0.073904000     -0.055667000
H       -2.574094000      0.384912000     -0.558304000
C       -1.892991000     -0.917876000      1.590657000
H       -2.561681000     -0.205608000      2.094101000
H       -2.531289000     -1.729454000      1.211139000
H       -1.177849000     -1.325320000      2.313296000
Re      -0.983403000      0.026374000     -0.042135000

28
symmetry c1
Re{(OC2H4)3Al(CH3)(H)} (4)
O        0.739057000     -0.475073000      0.902663000
O       -0.623380000      1.739806000     -0.483914000
O       -0.671099000     -1.350675000     -1.202535000
C        0.583082000      2.468292000     -0.947029000
H        0.540024000      2.366961000     -2.036217000
H        0.330324000      3.500114000     -0.681903000
C        1.911656000      1.997055000     -0.393539000
H        2.054198000      2.410682000      0.615886000
H        2.685988000      2.463457000     -1.023113000
C        0.584810000     -2.112218000     -1.386386000
H        0.762777000     -2.657923000     -0.454621000
H        0.305208000     -2.819720000     -2.174135000
C        1.760004000     -1.211379000     -1.762694000
H        1.519727000     -0.696144000     -2.703572000
H        2.606011000     -1.879233000     -1.993145000
C        1.571749000     -0.379930000      2.117986000
H        1.369786000      0.580613000      2.608030000
H        1.261942000     -1.193753000      2.782710000
C        2.999960000     -0.479038000      1.559802000
H        3.695094000      0.214418000      2.044556000
H        3.394122000     -1.496642000      1.657521000
Al       2.183983000      0.008575000     -0.215324000
H       -2.660792000      0.199926000     -0.598311000
C       -1.986208000     -0.322761000      1.828186000
H       -2.723227000      0.464992000      2.031722000
H       -2.550414000     -1.264904000      1.748846000
H       -1.279028000     -0.398414000      2.660636000
Re      -1.064140000      0.013620000     -0.020178000
0

29
symmetry c1
Re{(OC2H4)3CH(CH3)(H)} (6)
O       -0.620308000      0.046704000     -1.436794000
O        0.421187000     -1.536410000      0.686056000
O        0.547407000      1.647970000      0.450266000
C       -1.945855000     -0.275577000     -1.769829000
H       -2.190268000      0.209930000     -2.726078000
H       -2.042067000     -1.357866000     -1.944254000
C       -2.957229000      0.172260000     -0.702080000
H       -3.864957000     -0.436247000     -0.830984000
H       -3.262561000      1.209148000     -0.898730000
C       -0.907986000     -2.100928000      0.547014000
H       -1.116243000     -2.267119000     -0.509461000
H       -0.831886000     -3.075345000      1.042522000
C       -1.989541000     -1.289994000      1.252277000
H       -1.688611000     -1.187177000      2.304378000
H       -2.865398000     -1.958464000      1.256215000
C       -0.810043000      2.166190000      0.391961000
H       -0.714091000      3.182623000      0.788292000
H       -1.124845000      2.205463000     -0.653966000
C       -1.776718000      1.376260000      1.269868000
H       -2.577314000      2.094164000      1.503421000
H       -1.274886000      1.170321000      2.225805000
C       -2.507305000      0.091384000      0.767567000
H       -3.449458000      0.154941000      1.333000000
H        1.958541000     -0.151284000     -1.610690000
C        2.825103000     -0.037708000      0.844949000
H        2.630275000      0.041235000      1.924505000
H        3.388166000     -0.964640000      0.670914000
H        3.472083000      0.802237000      0.557489000
Re       0.975796000     -0.020658000     -0.235186000

29
symmetry c1
Re{(OC2H4)3SiH(CH3)(H)} (8)
O       -0.460176000     -0.638851000      1.543122000
O        0.355473000      1.596030000      0.408113000
O        0.360429000     -1.521032000     -0.825699000
C       -1.377465000      0.287470000      2.119922000
H       -1.675310000     -0.111693000      3.098263000
H       -0.890250000      1.256681000      2.279841000
C       -2.603680000      0.465334000      1.214267000
H       -3.109578000      1.414087000      1.449608000
H       -3.339721000     -0.325112000      1.430413000
C       -0.159734000      2.364581000     -0.703416000
H       -0.697173000      3.199992000     -0.243385000
H        0.682048000      2.755235000     -1.287699000
C       -1.085627000      1.490698000     -1.549133000
H       -0.470912000      0.866565000     -2.213326000
H       -1.666548000      2.145810000     -2.214493000
C       -0.888822000     -2.260192000     -0.648542000
H       -0.717303000     -3.195967000     -1.190424000
H       -1.024268000     -2.451939000      0.417381000
C       -2.050509000     -1.471530000     -1.236439000
H       -2.971891000     -2.035916000     -1.024638000
H       -1.955571000     -1.450057000     -2.331820000
Si      -2.351371000      0.327407000     -0.662776000
H       -3.677658000      0.671885000     -1.259688000
H        2.253559000     -0.574252000      1.279776000
C        2.563818000      0.377972000     -1.145792000
H        2.161157000      0.695477000     -2.121133000
H        3.195527000      1.193729000     -0.765350000
H        3.226628000     -0.477562000     -1.338123000
Re       1.002170000     -0.149011000      0.240056000

28
symmetry c1
Re{(OC2H4)3N(CH3)(H)} (10)
O        1.076519000      1.672223000      0.023956000
O       -0.076771000     -1.890761000      0.118218000
O       -0.531849000      0.072983000     -1.870590000
C        1.925575000     -0.513461000      1.421360000
H        2.863850000      0.047902000      1.316990000
H        1.463762000     -0.177954000      2.365566000
H        2.160469000     -1.579754000      1.524877000
C       -1.220716000     -2.008166000      0.962600000
H       -2.085483000     -2.313440000      0.359819000
H       -1.037752000     -2.795586000      1.705255000
C       -1.483106000     -0.679028000      1.676975000
H       -2.500274000     -0.637946000      2.097616000
H       -0.761380000     -0.557220000      2.488137000
C       -1.898640000     -0.190762000     -1.607498000
H       -2.038642000     -1.275558000     -1.516287000
H       -2.512098000      0.163941000     -2.446409000
C       -2.313276000      0.539621000     -0.323190000
H       -3.268005000      0.169973000      0.078908000
H       -2.432211000      1.601780000     -0.556465000
C       -0.040540000      2.501286000      0.377346000
H        0.343984000      3.414876000      0.844257000
H       -0.581093000      2.769794000     -0.541361000
C       -0.932746000      1.729612000      1.345818000
H       -1.846057000      2.288557000      1.601186000
H       -0.368795000      1.530091000      2.261930000
N       -1.248164000      0.422800000      0.716351000
H        2.006750000     -0.592011000     -1.316725000
Re       0.684902000     -0.161696000     -0.327665000

28
symmetry c1
Re{(OC2H4)3P(CH3)(H)} (12)
O       -0.868312000      1.804578000     -0.148638000
O        0.163356000     -1.502992000     -0.361480000
O       -0.325286000     -0.419316000      1.881458000
C       -2.223006000     -0.708921000     -1.447578000
H       -2.968530000      0.046991000     -1.726637000
H       -1.636162000     -0.982334000     -2.336162000
H       -2.772209000     -1.605773000     -1.128581000
C        1.013334000     -1.681487000     -1.474689000
H        1.024383000     -2.746742000     -1.743588000
H        0.648947000     -1.128696000     -2.354150000
C        2.421282000     -1.228794000     -1.076906000
H        2.855158000     -1.965092000     -0.386796000
H        3.070940000     -1.220326000     -1.964054000
C        1.035177000     -0.841486000      2.068188000
H        1.162703000     -1.824400000      1.603460000
H        1.157637000     -0.935434000      3.154217000
C        2.054813000      0.172693000      1.544574000
H        3.012650000     -0.071896000      2.028400000
H        1.789425000      1.165169000      1.937887000
C        0.411329000      2.426440000     -0.465927000
H        0.147627000      3.278730000     -1.099425000
H        0.817779000      2.808676000      0.477555000
C        1.370887000      1.492995000     -1.199517000
H        2.018972000      2.130212000     -1.815542000
H        0.782074000      0.902029000     -1.912354000
P        2.607808000      0.427514000     -0.240084000
H       -2.535890000      0.300532000      0.831992000
Re      -1.012715000     -0.018815000      0.151673000

Ta-reactant complexes
23
symmetry c1
Ta(OC2H4)3B-s
Ta       0.845740000     -0.000242000     -0.000036000
O        0.498253000      0.863527000     -1.614219000
O        0.498406000      0.966183000      1.554898000
O        0.497510000     -1.829900000      0.059250000
C       -0.815314000     -2.486358000      0.048936000
H       -1.045646000     -2.723352000      1.092549000
H       -0.687932000     -3.419928000     -0.508257000
C       -1.811689000     -1.502551000     -0.560078000
H       -1.711846000     -1.548668000     -1.655714000
H       -2.839331000     -1.836093000     -0.332350000
C       -0.814157000      1.285902000      2.128937000
H       -1.044290000      2.308234000      1.812353000
H       -0.686447000      1.270206000      3.215991000
C       -1.811000000      0.266834000      1.581829000
H       -1.711152000     -0.658983000      2.169544000
H       -2.838481000      0.631077000      1.757263000
C       -0.814360000      1.201146000     -2.177808000
H       -1.044868000      0.415901000     -2.904860000
H       -0.686547000      2.150407000     -2.707723000
C       -1.810926000      1.237094000     -1.021477000
H       -1.710722000      2.208954000     -0.513583000
H       -2.838508000      1.207134000     -1.424398000
B       -1.516392000      0.000381000      0.000063000

23
symmetry c1
Ta(OC2H4)3Al-s
Ta      -0.962188000     -0.001097000     -0.000530000
O       -0.573241000     -1.148796000     -1.408563000
O       -0.575882000     -0.646245000      1.698218000
O       -0.577870000      1.793223000     -0.290470000
C        0.610467000     -0.836786000      2.542878000
H        0.716278000      0.087456000      3.120316000
H        0.342695000     -1.648776000      3.226896000
C        1.848772000     -1.116563000      1.690556000
H        1.850098000     -2.178676000      1.402063000
H        2.740316000     -0.964310000      2.317487000
C        0.607922000      2.621340000     -0.545948000
H        0.715756000      2.658943000     -1.634901000
H        0.338272000      3.619554000     -0.185707000
C        1.845712000      2.024901000      0.125105000
H        1.844163000      2.305934000      1.189224000
H        2.737471000      2.493280000     -0.318123000
C        0.614295000     -1.782709000     -1.996021000
H        0.722175000     -2.744562000     -1.484114000
H        0.346686000     -1.969882000     -3.041133000
C        1.850807000     -0.902062000     -1.812561000
H        2.743620000     -1.519387000     -1.993815000
H        1.850535000     -0.121532000     -2.588492000
Al       1.756901000      0.002144000      0.000882000


24
symmetry c1
Ta(OC2H4)3CH-t
Ta      -1.030971000     -0.165085000      0.013372000
O       -0.332707000      0.095876000      1.774424000
O       -0.918628000      1.644300000     -0.654462000
O       -0.140702000     -1.306101000     -1.243524000
C        1.049770000     -1.988032000     -0.800865000
H        1.213997000     -2.830183000     -1.482991000
H        0.878851000     -2.415579000      0.197371000
C        2.284862000     -1.086510000     -0.807061000
H        3.085488000     -1.656965000     -0.310116000
H        2.604093000     -0.964168000     -1.850427000
C        0.376033000      2.276043000     -0.624108000
H        0.553620000      2.652981000      0.392477000
H        0.304688000      3.141631000     -1.292827000
C        1.531003000      1.397507000     -1.118407000
H        1.184912000      0.903475000     -2.034588000
H        2.306845000      2.107366000     -1.438134000
C        1.010606000     -0.274854000      2.130676000
H        1.128330000     -1.362096000      2.031382000
H        1.131645000     -0.031945000      3.192616000
C        2.094316000      0.462588000      1.343261000
H        2.030213000      1.528766000      1.595897000
H        3.039275000      0.109532000      1.784564000
C        2.257441000      0.340842000     -0.199681000
H        3.311020000      0.630244000     -0.315757000

24
symmetry c1
Ta(OC2H4)3SiH-s
Ta      -1.040277000      0.044740000     -0.021609000
O       -0.635222000     -0.640246000      1.655167000
O       -0.657630000     -1.186308000     -1.373778000
O       -0.624985000      1.838631000     -0.340920000
C        0.596127000     -1.025906000      2.307721000
H        0.423221000     -0.919438000      3.383423000
H        0.755339000     -2.087585000      2.088403000
C        1.766273000     -0.172128000      1.831801000
H        2.682278000     -0.559804000      2.303086000
H        1.632734000      0.847296000      2.224907000
C        0.445028000     -2.127063000     -1.418419000
H        0.297683000     -2.847945000     -0.605518000
H        0.350641000     -2.663199000     -2.368150000
C        1.794261000     -1.426672000     -1.298607000
H        2.044865000     -0.972686000     -2.269712000
H        2.563308000     -2.194935000     -1.126086000
C        0.606828000      2.586793000     -0.282108000
H        0.454047000      3.492863000     -0.877826000
H        0.759001000      2.885600000      0.761959000
C        1.770569000      1.755160000     -0.807228000
H        2.691611000      2.348179000     -0.696748000
H        1.629313000      1.610352000     -1.888344000
Si       2.107575000      0.011624000     -0.056614000
H        3.618326000     -0.005152000     -0.082062000

23
symmetry c1
Ta(OC2H4)3N-t
Ta      -0.927640000     -0.068618000      0.024976000
O       -0.310829000      0.085544000      1.854958000
O       -0.660154000      1.740102000     -0.697788000
O       -0.399391000     -1.468486000     -1.205610000
C        0.796931000     -2.176998000     -0.873928000
H        0.988166000     -2.936263000     -1.641634000
H        0.672737000     -2.698677000      0.086187000
C        1.957407000     -1.173869000     -0.805698000
H        2.809160000     -1.596846000     -0.254902000
H        2.294342000     -0.951347000     -1.822549000
C        0.636483000      2.330880000     -0.720516000
H        0.831751000      2.809488000      0.250140000
H        0.659125000      3.115071000     -1.488170000
C        1.686197000      1.276128000     -1.049977000
H        1.515105000      0.945826000     -2.078869000
H        2.710815000      1.676824000     -0.971915000
C        1.011995000     -0.344913000      2.185945000
H        1.076706000     -1.441752000      2.135675000
H        1.237520000     -0.041123000      3.215043000
C        1.981580000      0.308172000      1.204940000
H        1.979739000      1.385032000      1.397415000
H        3.010320000     -0.062935000      1.332648000
N        1.495957000      0.090301000     -0.177061000

23
symmetry c1
Ta(OC2H4)3P-t
Ta      -1.106558000     -0.039361000     -0.134900000
O       -0.744703000     -0.920901000      1.556225000
O       -0.741341000      1.820179000      0.149437000
O       -0.242096000     -1.242666000     -1.333966000
C        0.916839000     -2.041854000     -1.088774000
H        1.023497000     -2.729701000     -1.935985000
H        0.739632000     -2.641672000     -0.189076000
C        2.199444000     -1.212885000     -0.954959000
H        2.995098000     -1.896172000     -0.625219000
H        2.504775000     -0.868618000     -1.953118000
C        0.443722000      2.536013000     -0.209292000
H        0.872776000      2.962528000      0.706283000
H        0.152617000      3.369038000     -0.859554000
C        1.446862000      1.639749000     -0.934824000
H        0.952935000      1.179270000     -1.800011000
H        2.234612000      2.289724000     -1.339122000
C        0.563527000     -0.983287000      2.133141000
H        1.008145000     -1.958903000      1.897220000
H        0.428245000     -0.943141000      3.221474000
C        1.519250000      0.153382000      1.747895000
H        1.031354000      1.110991000      1.971624000
H        2.362502000      0.081935000      2.448455000
P        2.383984000      0.341230000      0.078137000

Transition states
28
symmetry c1
Ta{(OC2H4)3B(CH3)(H)}
Ta       0.730831000     -0.016109000     -0.395606000
O       -0.735651000     -0.169834000     -1.546935000
O        0.536891000      1.731601000      0.307765000
O        0.599917000     -1.632356000      0.606762000
C       -0.473831000      2.228608000      1.211503000
H       -0.172626000      1.952131000      2.229389000
H       -0.456878000      3.320805000      1.133338000
C       -1.842912000      1.648364000      0.856204000
H       -2.210050000      2.145866000     -0.051508000
H       -2.548141000      1.927744000      1.661449000
C       -0.559340000     -2.103752000      1.324521000
H       -1.145809000     -2.730806000      0.641191000
H       -0.190293000     -2.733221000      2.141440000
C       -1.382722000     -0.920863000      1.847294000
H       -0.800766000     -0.407552000      2.625669000
H       -2.277133000     -1.339571000      2.347616000
C       -2.157315000     -0.123452000     -1.783031000
H       -2.403306000      0.907088000     -2.060789000
H       -2.377774000     -0.778551000     -2.632454000
C       -2.814953000     -0.540873000     -0.472978000
H       -3.842081000     -0.143757000     -0.420955000
H       -2.891563000     -1.634448000     -0.428622000
B       -1.917686000      0.060490000      0.713225000
H        2.511313000     -0.023632000     -0.840066000
C        2.946026000     -0.017017000      0.586156000
H        3.752300000      0.695095000      0.390003000
H        2.445246000      0.283426000      1.524434000
H        3.346341000     -1.028475000      0.694260000

28
symmetry c1
Ta{(OC2H4)3Al(CH3)(H)}
Ta       0.856811000     -0.068988000     -0.335886000
O       -0.884326000     -0.263982000     -1.125927000
O        0.698586000      1.789770000     -0.060701000
O        0.712870000     -1.658407000      0.692232000
C       -0.159007000      2.628293000      0.765014000
H        0.164123000      2.491728000      1.804139000
H        0.068543000      3.657338000      0.466187000
C       -1.636044000      2.269540000      0.593246000
H       -1.996315000      2.688395000     -0.358166000
H       -2.197437000      2.786957000      1.386839000
C       -0.412921000     -2.080791000      1.508993000
H       -1.007327000     -2.766004000      0.890018000
H        0.016127000     -2.658705000      2.335773000
C       -1.259960000     -0.897919000      1.993467000
H       -0.669223000     -0.317083000      2.718315000
H       -2.101814000     -1.323750000      2.567302000
C       -2.083344000     -0.912249000     -1.715931000
H       -2.144379000     -0.516928000     -2.732746000
H       -1.863754000     -1.982949000     -1.751106000
C       -3.241897000     -0.539116000     -0.797402000
H       -3.940649000      0.149288000     -1.283481000
H       -3.799170000     -1.419184000     -0.460840000
Al      -1.993621000      0.293019000      0.535987000
H        2.587202000     -0.255064000     -1.023329000
C        3.118276000     -0.128220000      0.221445000
H        3.926757000      0.549234000     -0.062623000
H        2.658543000      0.293047000      1.150311000
H        3.501016000     -1.125698000      0.447444000

29
symmetry c1
Ta{(OC2H4)3CH(CH3)(H)}
Ta       0.866858000     -0.329050000     -0.176982000
O        0.540656000      1.057811000     -1.429592000
O        0.312023000     -0.218159000      1.658398000
O       -0.392731000     -1.631606000     -0.692865000
C        2.834848000      0.784200000      0.700773000
H        2.187488000      1.681615000      0.629947000
H        2.955464000      0.499505000      1.749176000
H        3.800800000      1.059183000      0.267929000
C       -0.630316000      0.783637000      2.078485000
H       -0.668851000      0.729387000      3.173296000
H       -0.228334000      1.774985000      1.829114000
C       -2.070782000      0.654245000      1.562659000
H       -2.536079000     -0.200834000      2.072120000
H       -2.567058000      1.546321000      1.976147000
C       -1.644517000     -1.977546000     -0.108639000
H       -1.503676000     -2.089329000      0.975055000
H       -1.960401000     -2.944048000     -0.519915000
C       -2.678833000     -0.915732000     -0.429144000
H       -3.625421000     -1.272012000      0.006403000
H       -2.826983000     -0.898418000     -1.516709000
C       -0.446565000      2.052892000     -1.085754000
H       -0.138863000      2.564821000     -0.163579000
H       -0.415889000      2.798520000     -1.889023000
C       -1.893509000      1.557904000     -0.982960000
H       -2.175459000      1.177462000     -1.973466000
H       -2.457846000      2.495144000     -0.853441000
C       -2.472926000      0.547609000      0.064345000
H        2.735303000     -0.378509000     -0.021598000
H       -3.518803000      0.889212000      0.092101000

29
symmetry c1
Ta{(OC2H4)3SiH(CH3)(H)}
Ta       0.926310000     -0.242208000     -0.312947000
O        0.724979000      1.579282000     -0.813818000
O        0.678141000     -0.987909000      1.426271000
O       -0.497353000     -1.048108000     -1.213060000
C        3.070951000      0.318620000      0.595747000
H        2.438886000      1.034384000      1.165126000
H        3.490788000     -0.407638000      1.295696000
H        3.862652000      0.894603000      0.109312000
C       -0.271113000     -0.544915000      2.408943000
H       -0.172084000     -1.229317000      3.259436000
H        0.026713000      0.455068000      2.754331000
C       -1.720743000     -0.539333000      1.918992000
H       -2.000434000     -1.578821000      1.691836000
H       -2.333971000     -0.252576000      2.786799000
C       -1.767615000     -1.682269000     -1.319180000
H       -1.790638000     -2.510832000     -0.600184000
H       -1.852560000     -2.098748000     -2.329048000
C       -2.836744000     -0.643032000     -1.015328000
H       -3.791279000     -1.145137000     -0.801349000
H       -3.003950000     -0.017549000     -1.902514000
C       -0.115242000      2.510755000     -0.106474000
H        0.234302000      2.585529000      0.933115000
H        0.045067000      3.486808000     -0.578279000
C       -1.599048000      2.148423000     -0.155965000
H       -1.929842000      2.234242000     -1.201777000
H       -2.127373000      2.946102000      0.388377000
Si      -2.396897000      0.502426000      0.449434000
H        2.760554000     -0.483243000     -0.514147000
H       -3.729716000      0.978730000      0.940781000

28
symmetry c1
Ta{(OC2H4)3N(CH3)(H)}
Ta       0.670052000      0.027312000     -0.221697000
O        0.467552000      1.945700000      0.135025000
O        0.654546000     -1.350942000      1.228558000
O       -0.272510000     -1.044874000     -1.586531000
C        3.018183000     -0.060616000      0.318635000
H        2.824536000      0.650269000      1.135222000
H        4.021180000      0.167257000     -0.060886000
H        3.008930000     -1.089209000      0.692167000
H        2.508151000      0.163996000     -0.779113000
C       -0.829661000      2.532933000      0.140566000
H       -0.796017000      3.504996000      0.648687000
H       -1.164348000      2.705572000     -0.891771000
C       -1.684115000     -1.212713000     -1.603411000
H       -1.947722000     -2.183072000     -1.161434000
H       -2.039613000     -1.214941000     -2.642011000
C       -0.637964000     -1.920101000      1.420189000
H       -0.836007000     -2.650047000      0.624282000
H       -0.661141000     -2.458970000      2.377903000
C       -1.718575000     -0.830912000      1.461899000
H       -1.621572000     -0.311100000      2.418723000
H       -2.731006000     -1.259822000      1.404802000
C       -1.756639000      1.584122000      0.889879000
H       -2.818313000      1.864812000      0.808127000
H       -1.468169000      1.602703000      1.943898000
C       -2.330719000     -0.066642000     -0.833448000
H       -2.289777000      0.840774000     -1.445431000
H       -3.382469000     -0.270047000     -0.575248000
N       -1.525738000      0.198227000      0.386245000

28
symmetry c1
Ta{(OC2H4)3P(CH3)(H)}
Ta      -0.994562000     -0.007237000      0.260997000
O       -0.734197000      1.781886000     -0.345789000
O       -0.461678000     -1.774651000     -0.169088000
O        0.269400000      0.209264000      1.660829000
C       -2.820499000     -0.131260000     -1.184744000
H       -1.915993000     -0.140863000     -1.855446000
H       -3.401542000      0.758705000     -1.437535000
H       -3.385581000     -1.043739000     -1.387693000
H       -2.876023000     -0.113537000      0.196153000
C        0.555756000      2.406586000     -0.330756000
H        0.423324000      3.417227000     -0.736074000
H        0.879304000      2.486130000      0.715639000
C        1.458783000     -0.489548000      1.994945000
H        1.282959000     -1.567045000      1.896548000
H        1.693772000     -0.278903000      3.046043000
C        0.715805000     -2.347504000     -0.734772000
H        1.286516000     -2.823535000      0.070912000
H        0.397119000     -3.138243000     -1.425505000
C        1.571692000     -1.341903000     -1.504998000
H        0.964903000     -0.907952000     -2.311538000
H        2.347160000     -1.939134000     -2.005835000
C        1.601870000      1.678401000     -1.179738000
H        2.417551000      2.400855000     -1.330695000
H        1.177444000      1.505790000     -2.179295000
C        2.621584000     -0.033531000      1.113402000
H        2.927863000      0.975848000      1.423721000
H        3.482931000     -0.681661000      1.329417000
P        2.538878000      0.095928000     -0.751285000

Products 
28
symmetry c1
Ta{(OC2H4)3B(CH3)(H)}
Ta       0.970377000      0.069294000      0.081162000
O       -0.641585000     -0.701647000     -0.788659000
O        0.332601000      1.791133000     -0.222772000
O        0.471002000     -0.805930000      1.662816000
C       -0.963683000      2.464353000     -0.199778000
H       -1.115634000      2.798173000      0.831584000
H       -0.846442000      3.344106000     -0.839118000
C       -2.066910000      1.520254000     -0.665244000
H       -2.047330000      1.454456000     -1.762974000
H       -3.029489000      1.990487000     -0.404716000
C       -0.888605000     -1.144756000      2.074631000
H       -1.105545000     -2.129212000      1.642552000
H       -0.855835000     -1.233009000      3.164637000
C       -1.864381000     -0.078609000      1.584827000
H       -1.582181000      0.868716000      2.069876000
H       -2.862005000     -0.326972000      1.983280000
C       -1.572841000     -1.466885000     -1.621522000
H       -1.542386000     -1.047204000     -2.631949000
H       -1.246293000     -2.510949000     -1.645062000
C       -2.831997000     -1.129128000     -0.829733000
H       -3.675928000     -0.808825000     -1.450514000
H       -3.157808000     -1.966817000     -0.201825000
B       -2.017740000      0.035976000     -0.030883000
H        2.701265000      0.457662000      0.564097000
C        2.084935000     -0.983272000     -1.506354000
H        2.736277000     -0.271675000     -2.032606000
H        2.751555000     -1.725685000     -1.044662000
H        1.453724000     -1.491755000     -2.245059000

28
symmetry c1
Ta{(OC2H4)3Al(CH3)(H)}
Ta       1.064988000      0.075478000      0.037100000
O       -0.547970000     -0.910160000     -0.632432000
O        0.406767000      1.688782000     -0.598222000
O        0.596057000     -0.360847000      1.787776000
C       -0.756609000      2.571794000     -0.711450000
H       -0.831804000      3.088716000      0.250553000
H       -0.475918000      3.298149000     -1.480438000
C       -2.019826000      1.783141000     -1.031329000
H       -2.044526000      1.554135000     -2.106359000
H       -2.875501000      2.448142000     -0.838254000
C       -0.646570000     -0.663596000      2.491908000
H       -0.833596000     -1.731618000      2.329158000
H       -0.415120000     -0.506972000      3.550588000
C       -1.797412000      0.200902000      1.981383000
H       -1.603432000      1.242201000      2.280618000
H       -2.701017000     -0.103090000      2.535675000
C       -1.358245000     -1.960285000     -1.289306000
H       -1.171739000     -1.870597000     -2.363457000
H       -0.974731000     -2.920572000     -0.932173000
C       -2.796602000     -1.634201000     -0.877604000
H       -3.464264000     -1.539503000     -1.739465000
H       -3.209360000     -2.391254000     -0.202482000
Al      -2.134897000      0.053886000     -0.007681000
H        2.795957000      0.573645000      0.382557000
C        2.191712000     -1.308059000     -1.272786000
H        2.839488000     -0.733449000     -1.949508000
H        2.867160000     -1.916232000     -0.653436000
H        1.570425000     -1.982473000     -1.873910000

29
symmetry c1
Ta{(OC2H4)3CH(CH3)(H)}
Ta       0.981833000      0.046248000     -0.260170000
O       -0.469238000      0.125586000     -1.551990000
O        0.361583000     -1.659846000      0.251882000
O        0.286748000      1.618398000      0.517864000
C       -1.614381000     -0.678955000     -1.769783000
H       -1.963756000     -0.528941000     -2.799315000
H       -1.320694000     -1.730713000     -1.670358000
C       -2.747802000     -0.323855000     -0.798418000
H       -3.465324000     -1.157319000     -0.846006000
H       -3.283426000      0.549519000     -1.195791000
C       -0.811958000     -2.124929000      0.932441000
H       -1.409229000     -2.713951000      0.228777000
H       -0.465221000     -2.797217000      1.725576000
C       -1.610441000     -0.989301000      1.562479000
H       -0.909115000     -0.414753000      2.182646000
H       -2.290824000     -1.476663000      2.275136000
C       -1.007661000      2.206732000      0.271180000
H       -0.948822000      3.239110000      0.632858000
H       -1.167586000      2.210663000     -0.812586000
C       -2.141153000      1.487828000      0.986682000
H       -3.043498000      2.072085000      0.747722000
H       -1.992791000      1.590821000      2.070225000
C       -2.464662000     -0.002830000      0.694475000
H       -3.469499000     -0.088633000      1.131630000
H        2.236761000      0.202695000     -1.568493000
C        2.652865000     -0.045117000      1.227471000
H        2.262446000     -0.121567000      2.254949000
H        3.307346000     -0.914003000      1.065227000
H        3.287840000      0.852259000      1.189032000

29
symmetry c1
Ta{(OC2H4)3SiH(CH3)(H)}
Ta       1.087930000     -0.015344000     -0.252275000
O       -0.313666000      0.328262000     -1.555717000
O        0.365123000     -1.770429000     -0.157578000
O        0.778269000      1.784699000      0.248103000
C       -1.456370000     -0.394783000     -2.010529000
H       -1.593843000     -0.134823000     -3.066742000
H       -1.244739000     -1.469411000     -1.943791000
C       -2.675850000     -0.017236000     -1.172411000
H       -3.484473000     -0.742899000     -1.344367000
H       -3.062766000      0.958034000     -1.501223000
C       -0.681904000     -2.422506000      0.563608000
H       -1.328301000     -2.923390000     -0.167202000
H       -0.215063000     -3.196109000      1.186305000
C       -1.486986000     -1.454051000      1.434835000
H       -0.865103000     -1.142136000      2.282778000
H       -2.316077000     -2.031921000      1.871892000
C       -0.471376000      2.485633000      0.294889000
H       -0.252631000      3.484377000      0.688596000
H       -0.836597000      2.575352000     -0.735604000
C       -1.494384000      1.773816000      1.184407000
H       -2.345135000      2.464238000      1.302386000
H       -1.063559000      1.664825000      2.190205000
Si      -2.321155000      0.110799000      0.688415000
H       -3.645792000      0.176612000      1.375558000
H        2.638225000     -0.090571000     -1.200911000
C        1.675182000     -0.285821000      1.859825000
H        1.122290000      0.269647000      2.625754000
H        1.801571000     -1.326063000      2.184452000
H        2.681615000      0.182609000      1.823949000

28
symmetry c1
Ta{(OC2H4)3N(CH3)(H)}

Ta       0.838694000     -0.141838000     -0.274207000
O        0.825949000      1.757249000      0.002756000
O       -0.042100000     -1.834400000      0.050287000
O       -0.347179000      0.066696000     -1.817317000
C        1.402051000     -0.245052000      1.873424000
H        2.486588000     -0.084981000      1.683494000
H        1.114676000      0.542991000      2.577697000
H        1.305208000     -1.224422000      2.358325000
C       -1.160592000     -2.084838000      0.887385000
H       -1.951915000     -2.547555000      0.283391000
H       -0.881548000     -2.794297000      1.677543000
C       -1.639663000     -0.762641000      1.519780000
H       -2.704611000     -0.823661000      1.797507000
H       -1.056644000     -0.553016000      2.417556000
C       -1.692678000     -0.358623000     -1.784618000
H       -1.729154000     -1.451517000     -1.691743000
H       -2.201630000     -0.064910000     -2.711384000
C       -2.333278000      0.335405000     -0.579462000
H       -3.286918000     -0.129725000     -0.287852000
H       -2.534203000      1.376526000     -0.849795000
C       -0.338704000      2.516797000      0.293362000
H       -0.054918000      3.444639000      0.804569000
H       -0.827641000      2.775604000     -0.656481000
C       -1.260616000      1.674498000      1.181186000
H       -2.241067000      2.159899000      1.312499000
H       -0.798319000      1.550213000      2.162735000
N       -1.384209000      0.334368000      0.566603000
H        2.474431000     -0.531790000     -1.059298000

28
symmetry c1
Ta{(OC2H4)3P(CH3)(H)}
Ta       1.033130000     -0.050334000     -0.252503000
O        0.426079000      1.639582000      0.325008000
O        0.431588000     -1.482575000      0.799690000
O       -0.242753000     -0.234152000     -1.690789000
C        2.983816000      0.169552000      0.805173000
H        3.571582000      1.009409000      0.410297000
H        2.818525000      0.351317000      1.880023000
H        3.605423000     -0.730834000      0.707228000
C       -0.786381000     -2.144299000      1.157927000
H       -0.624572000     -3.217310000      1.008100000
H       -0.941277000     -1.974501000      2.230042000
C       -1.979235000     -1.685465000      0.326600000
H       -1.757122000     -1.880618000     -0.726670000
H       -2.815070000     -2.343306000      0.599548000
C       -1.504633000      0.130630000     -2.196064000
H       -2.022113000     -0.782179000     -2.522124000
H       -1.370899000      0.760879000     -3.085416000
C       -2.325212000      0.889119000     -1.152778000
H       -3.312697000      1.099153000     -1.585082000
H       -1.851237000      1.860892000     -0.978854000
C       -0.585318000      2.085395000      1.230429000
H       -0.076991000      2.549345000      2.083967000
H       -1.165232000      2.864958000      0.722954000
C       -1.469724000      0.943142000      1.722002000
H       -2.122006000      1.359388000      2.500920000
H       -0.833642000      0.206032000      2.226955000
P       -2.644764000      0.075424000      0.514935000
H        2.231111000     -0.300923000     -1.594205000
